# Supplementary material
Source: publisher site journal article supplement (https://www.degruyterbrill.com/publication/isbn/9783110784299/downloadAsset/9783110784299_Table%2011.3_LCOE%20of%20Multi-MW%20Heat%20Pump.xlsx)
Supplement: Supplementary file 1 [file 9783110784299_Table%2011.3_LCOE%20of%20Multi-MW%20Heat%20Pump.xlsx]

## Sheet: Tab11.3
	Eingangsdaten:
						Verwandter Wert in %:
	Vorgeschlagener Fremdkapitalzins:			0.0464		0.053
	Vorgeschlagene Eigenkapitalverzinsung:			0.045		0.1
	Gewichteter Kapitalkostensatz					0.072599				Table 20
	Übernommene Investitionskosten in €:					10000000
	Betrachteter Zeitraum in Jahren					25
					1	2	3	4	5	6	7	8	9	10	11	12	13	14	15	16	17	18	19	20	21	22	23	24	25	26	27	28	29	30
				2024	2025	2026	2027	2028	2029	2030	2031	2032	2033	2034	2035	2036	2037	2038	2039	2040	2041	2042	2043	2044	2045	2046	2047	2048	2049	2050	2051	2052	2053	2054
		Operating Expenses			1.41181e+06	1.35044e+06	1.39096e+06	1.43269e+06	1.47567e+06	1.51994e+06	1.56554e+06	1.6125e+06	1.66088e+06	1.7107e+06	1.76202e+06	1.81488e+06	1.86933e+06	1.92541e+06	1.98317e+06	2.04267e+06	2.10395e+06	2.16707e+06	2.23208e+06	2.29904e+06	2.36801e+06	2.36801e+06	2.36801e+06	2.36801e+06	2.36801e+06	2.36801e+06	2.36801e+06	2.36801e+06	2.36801e+06	2.36801e+06
		Annual Energy Production in kWh:			2500000	2500000	2500000	2500000	2500000	2500000	2500000	2500000	2500000	2500000	2500000	2500000	2500000	2500000	2500000	2500000	2500000	2500000	2500000	2500000	2500000	0	52500000	0	0	0	0	0	0	0
		Discounted OPEX:			1.31625e+06	1.17382e+06	1.1272e+06	1.08243e+06	1.03944e+06	998163	958520	920452	883895	848791	815080	782709	751623	721772	693106	665579	639145	613761	589385	565977	543499	506712	472415	440440	410629	382835	356923	332765	310241	289243
		Descounted Annual Energy Production:			2.33079e+06	2.17303e+06	2.02595e+06	1.88882e+06	1.76097e+06	1.64178e+06	1.53066e+06	1.42706e+06	1.33047e+06	1.24041e+06	1.15646e+06	1.07818e+06	1.0052e+06	937166	873734	814595	759459	708055	660130	615449	573792	0	1.04737e+07	0	0	0	0	0	0	0
		Logical Test			1	1	1	1	1	1	1	1	1	1	1	1	1	1	1	1	1	1	1	1	1	1	1	1	1	0	0	0	0	0
		Total Investment Costs:			10000000
		Assumed Total Opex:			1.95608e+07
		Assumed Total Energy Yield:			3.70058e+07
		LCOE in Cent/kWh:			7.98815
